# Supplementary material for: Cancer spheroids derived exosomes reveal more molecular features relevant to progressed cancer
Source: PubMed Central journal article supplement — Biochem Biophys Rep. 2021 May 25;26:101026. doi: 10.1016/j.bbrep.2021.101026 (PMC8167213; doi:10.1016/j.bbrep.2021.101026), 2021-05-25
Supplement: mmc1.pdf [file mmc1.pdf]

# Cancer Spheroids Derived Exosomes Reveal More Molecular Features Relevant to Progressed Cancer

Junfang Tu <sup>a,\*</sup>, Xun Luo <sup>a</sup>, Haitao Liu <sup>a</sup>, Jifeng Zhang <sup>a</sup>, Mei He<sup>a</sup>

<sup>a</sup> *School of Biological Engineering,  
Huainan Normal University  
Huainan, Anhui 232038, China*

\* Corresponding author. School of Biological Engineering, Huainan Normal University. Huainan, Anhui 232038, China.

E-mail address: [tjf\\_tuzi@163.com](mailto:tjf_tuzi@163.com) (J. Tu).

## Supplementary Information

**Table S1.** Primer sequences used in qPCR.

| Gene       | Primer sequences                                                                |
|------------|---------------------------------------------------------------------------------|
| Glypican-1 | Forward: 5'-CTTAGTGCTGCTTTGCTTTTCAT-3'<br>Reverse: 5'-AGGGTTATTATGGGGTGGACTT-3' |
| GAPDH      | Forward: 5'-AGGGCTGCTTTTAACTCTGGT-3'<br>Reverse: 5'-CCCCACTTGATTTTGGAGGGA-3'    |
| miR-96-5p  | Forward: 5'-TTTGGCACTAGCACATTTTGGCT-3'                                          |
| miR-1246   | Forward: 5'-AATGGATTTTGGAGCAGG-3'                                               |
| miR-21     | Forward: 5'-TAGCTTATCAGACTGATGTTGA-3'                                           |
| miR-4454   | Forward: 5'-GGATCCGAGTCACGGCACCA-3'                                             |

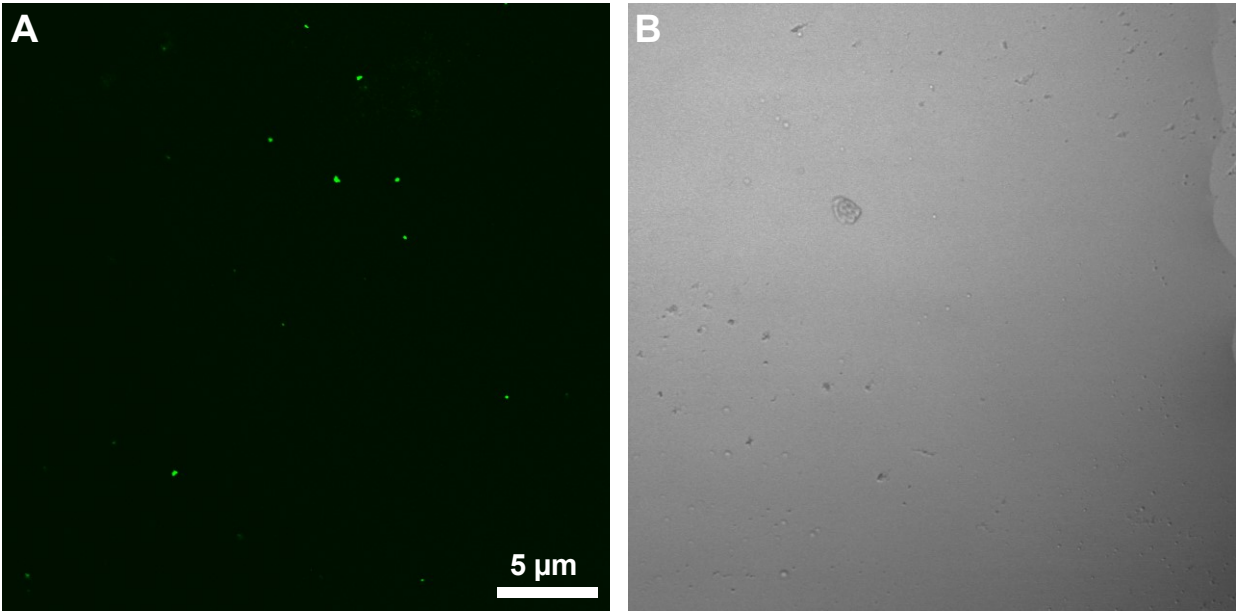

**Figure S1.** The labeling of exosomes isolated from PANC-1 3D spheroids. (A) Exosomes were stained with membrane permeable SYTO™ RNASelect™ green fluorescent cell stain (Thermofisher) to fluorescently label the RNA present inside the exosomes. (B) Bright-field image of the same area. Samples were visualized by confocal laser scanning microscopy equipped with a 20x lens (FV3000, Olympus), irradiated by 488 nm. Scale bar: 5 μm.
